# Supplementary material for: Safety and Efficacy of Upadacitinib for Atopic Dermatitis in Japan: Analysis of the 3-Year Phase 3 Rising Up Study
Source: Springer Nature journal article supplement (doi:10.1007/s13555-023-01071-2), 2023-12-21

## **SUPPLEMENTARY MATERIALS**

### **Safety and Efficacy of Upadacitinib for Atopic Dermatitis in Japan: Analysis of the 3-Year Phase 3 Rising Up Study**

Norito Katoh,<sup>1</sup> Masanori Ikeda,<sup>2,3</sup> Yukihiro Ohya,<sup>4</sup> Hiroyuki Murota,<sup>5</sup> Xiaofei Hu,<sup>6</sup> John Liu,<sup>6</sup> Hayato Niiyama,<sup>7</sup> Takuya Sasaki,<sup>7</sup> Eliza M. Raymundo,<sup>6</sup> Hidehisa Saeki<sup>8</sup>

<sup>1</sup>Department of Dermatology, Kyoto Prefectural University, Kyoto, Japan; <sup>2</sup>Okayama University School of Medicine, Okayama, Japan; <sup>3</sup>Department of Pediatrics, Fukuyama Municipal Hospital, Hiroshima, Japan; <sup>4</sup>Allergy Center, National Center for Child Health and Development, Tokyo, Japan; <sup>5</sup>Department of Dermatology, Nagasaki University Graduate School of Biomedical Sciences, Nagasaki, Japan; <sup>6</sup>AbbVie Inc., North Chicago, Illinois, United States; <sup>7</sup>AbbVie GK, Tokyo, Japan; <sup>8</sup>Department of Dermatology, Nippon Medical School, Tokyo, Japan

**Corresponding Author:** Eliza M. Raymundo, MD; [eliza.raymundo@abbvie.com](mailto:eliza.raymundo@abbvie.com)

**Supplementary Table 1** Patient demographics and baseline characteristics among adolescents

| <b>Characteristic</b>                              | <b>Upadacitinib<br/>15 mg<br/>(N = 10)</b> | <b>Upadacitinib<br/>30 mg<br/>(N = 10)</b> | <b>Placebo<br/>(N = 9)</b> |
|----------------------------------------------------|--------------------------------------------|--------------------------------------------|----------------------------|
| Age, years, mean (SD)                              | 15.4 (1.9)                                 | 16.3 (1.5)                                 | 14.9 (1.6)                 |
| Sex, <i>n</i> (%)                                  |                                            |                                            |                            |
| Female                                             | 3 (30.0)                                   | 2 (20.0)                                   | 2 (22.2)                   |
| Male                                               | 7 (70.0)                                   | 8 (80.0)                                   | 7 (77.8)                   |
| Weight, kg, mean (SD)                              | 51.3 (7.2)                                 | 60.7 (12.9)                                | 58.8 (10.8)                |
| Affected BSA, %, mean (SD)                         | 64.7 (21.5)                                | 65.4 (25.2)                                | 57.5 (26.3)                |
| Disease duration since diagnosis, years, mean (SD) | 10.4 (5.1)                                 | 12.0 (4.6)                                 | 9.5 (5.1)                  |
| vIGA-AD, <i>n</i> (%)                              |                                            |                                            |                            |
| Moderate (score of < 4)                            | 6 (60.0)                                   | 6 (60.0)                                   | 5 (55.6)                   |
| Severe (score of 4)                                | 4 (40.0)                                   | 4 (40.0)                                   | 4 (44.4)                   |
| EASI, mean (SD)                                    | 34.6 (13.4)                                | 37.0 (14.7)                                | 32.3 (16.0)                |
| WP-NRS, mean (SD)                                  | 6.7 (1.4)                                  | 5.9 (1.1)                                  | 6.4 (1.6)                  |
| hsCRP, mg/L, mean (SD)                             | 1.7 (2.9)                                  | 0.9 (0.9)                                  | 5.1 (13.1)                 |

*BSA* body surface area, *EASI* Eczema Area and Severity Index, *hsCRP* high-sensitivity C-reactive protein, *vIGA-AD* validated Investigator Global Assessment for Atopic Dermatitis, *WP-NRS* Worst Pruritus Numerical Rating Scale

Adapted from Katoh N, et al. Safety and Efficacy of Upadacitinib for Atopic Dermatitis in Japan: 2-Year Interim Results from the Phase 3 Rising Up Study. *Dermatol Ther (Heidelb)*. 2023;13:221–234. Creative Commons license and disclaimer available from: <http://creativecommons.org/licenses/by/4.0/>

Percentages were calculated using nonmissing values

**Supplementary Table 2** Exposure-adjusted event rates through 112 weeks and 160 weeks in the Rising Up study

| Events (E/100 PY)                                    | Week 112 <sup>a</sup>                             |                                                   | Week 160                                          |                                                   |
|------------------------------------------------------|---------------------------------------------------|---------------------------------------------------|---------------------------------------------------|---------------------------------------------------|
|                                                      | Upadacitinib<br>15 mg<br>(N = 133;<br>PY = 289.4) | Upadacitinib<br>30 mg<br>(N = 136;<br>PY = 287.7) | Upadacitinib<br>15 mg<br>(N = 133;<br>PY = 363.8) | Upadacitinib<br>30 mg<br>(N = 136;<br>PY = 362.9) |
| <b>Overview</b>                                      |                                                   |                                                   |                                                   |                                                   |
| Any AE                                               | 563 (194.5)                                       | 594 (206.4)                                       | 699 (192.1)                                       | 778 (214.4)                                       |
| AE with reasonable possibility of being drug-related | 146 (50.4)                                        | 155 (53.9)                                        | 170 (46.7)                                        | 195 (53.7)                                        |
| Severe AE                                            | 20 (6.9)                                          | 19 (6.6)                                          | 22 (6.0)                                          | 23 (6.3)                                          |
| Serious AE                                           | 17 (5.9)                                          | 11 (3.8)                                          | 18 (4.9)                                          | 16 (4.4)                                          |
| AE leading to discontinuation of study drug          | 7 (2.4)                                           | 5 (1.7)                                           | 9 (2.5)                                           | 7 (1.9)                                           |
| Deaths                                               | 0                                                 | 0                                                 | 0                                                 | 0                                                 |
| <b>Most common AEs<sup>b</sup></b>                   |                                                   |                                                   |                                                   |                                                   |
| Nasopharyngitis                                      | 51 (17.6)                                         | 65 (22.6)                                         | 55 (15.1)                                         | 68 (18.7)                                         |
| Acne                                                 | 39 (13.5)                                         | 58 (20.2)                                         | 43 (11.8)                                         | 64 (17.6)                                         |
| Herpes zoster                                        | 18 (6.2)                                          | 33 (11.5)                                         | 27 (7.4)                                          | 40 (11.0)                                         |
| Pyrexia                                              | 14 (4.8)                                          | 17 (5.9)                                          | 25 (6.9)                                          | 33 (9.1)                                          |
| Injection site pain <sup>c</sup>                     | 1 (0.3)                                           | 5 (1.7)                                           | 4 (1.1)                                           | 19 (5.2)                                          |
| Dermatitis atopic                                    | 17 (5.9)                                          | 10 (3.5)                                          | 20 (5.5)                                          | 18 (5.0)                                          |
| Headache                                             | 10 (3.5)                                          | 9 (3.1)                                           | 11 (3.0)                                          | 16 (4.4)                                          |
| Blood CPK increased                                  | 6 (2.1)                                           | 13 (4.5)                                          | 8 (2.2)                                           | 16 (4.4)                                          |
| Arthralgia                                           | 1 (0.3)                                           | 13 (4.5)                                          | 2 (0.5)                                           | 15 (4.1)                                          |
| Herpes simplex                                       | 23 (7.9)                                          | 11 (3.8)                                          | 32 (8.8)                                          | 14 (3.9)                                          |
| Oral herpes                                          | 16 (5.5)                                          | 11 (3.8)                                          | 19 (5.2)                                          | 14 (3.9)                                          |

**Supplementary Table 2** Exposure-adjusted event rates through 112 weeks and 160 weeks in the Rising Up study

| Events (E/100 PY)          | Week 112 <sup>a</sup>                             |                                                   | Week 160                                          |                                                   |
|----------------------------|---------------------------------------------------|---------------------------------------------------|---------------------------------------------------|---------------------------------------------------|
|                            | Upadacitinib<br>15 mg<br>(N = 133;<br>PY = 289.4) | Upadacitinib<br>30 mg<br>(N = 136;<br>PY = 287.7) | Upadacitinib<br>15 mg<br>(N = 133;<br>PY = 363.8) | Upadacitinib<br>30 mg<br>(N = 136;<br>PY = 362.9) |
| ALT increased              | 8 (2.8)                                           | 10 (3.5)                                          | 13 (3.6)                                          | 13 (3.6)                                          |
| Tinea pedis                | 2 (0.7)                                           | 11 (3.8)                                          | 3 (0.8)                                           | 13 (3.6)                                          |
| Paronychia                 | 0                                                 | 4 (1.4)                                           | 1 (0.3)                                           | 12 (3.3)                                          |
| Influenza                  | 7 (2.4)                                           | 11 (3.8)                                          | 7 (1.9)                                           | 11 (3.0)                                          |
| Neutropenia                | 0                                                 | 9 (3.1)                                           | 1 (0.3)                                           | 11 (3.0)                                          |
| Asthma                     | 1 (0.3)                                           | 9 (3.1)                                           | 1 (0.3)                                           | 10 (2.8)                                          |
| Eczema herpeticum          | 15 (5.2)                                          | 6 (2.1)                                           | 18 (4.9)                                          | 9 (2.5)                                           |
| Folliculitis               | 17 (5.9)                                          | 7 (2.4)                                           | 18 (4.9)                                          | 8 (2.2)                                           |
| Skin papilloma             | 16 (5.5)                                          | 7 (2.4)                                           | 17 (4.7)                                          | 8 (2.2)                                           |
| Pharyngitis                | 6 (2.1)                                           | 6 (2.1)                                           | 6 (1.6)                                           | 8 (2.2)                                           |
| Anemia                     | 3 (1.0)                                           | 6 (2.1)                                           | 3 (0.8)                                           | 8 (2.2)                                           |
| COVID-19                   | 2 (0.7)                                           | 3 (1.0)                                           | 8 (2.2)                                           | 7 (1.9)                                           |
| Conjunctivitis<br>allergic | 5 (1.7)                                           | 4 (1.4)                                           | 10 (2.7)                                          | 6 (1.7)                                           |
| Gastroenteritis            | 8 (2.8)                                           | 5 (1.7)                                           | 9 (2.5)                                           | 5 (1.4)                                           |
| Dental caries              | 7 (2.4)                                           | 4 (1.4)                                           | 8 (2.2)                                           | 4 (1.1)                                           |
| Furuncle                   | 8 (2.8)                                           | 4 (1.4)                                           | 9 (2.5)                                           | 4 (1.1)                                           |
| Tonsillitis                | 7 (2.4)                                           | 2 (0.7)                                           | 9 (2.5)                                           | 2 (0.6)                                           |

AE adverse event, ALT alanine aminotransferase, CPK creatine phosphokinase, E/100 PY events per 100 patient-years, PY patient-years

<sup>a</sup>Data through week 112 were previously reported [17]

<sup>b</sup>Most common AEs are defined as those occurring at a rate of  $\geq 2$  E/100 PY in either treatment group at week 160

<sup>c</sup>All AEs of injection site pain were considered to be possibly related to COVID-19 vaccination

**Supplementary Table 3** Treatment-emergent serious adverse events with reasonable possibility of being related to study drug

| Events (E/100 PY)                       | Week 160                                       |                                                |
|-----------------------------------------|------------------------------------------------|------------------------------------------------|
|                                         | Upadacitinib 15 mg<br>(N = 133;<br>PY = 363.8) | Upadacitinib 30 mg<br>(N = 136;<br>PY = 362.9) |
| Any AE                                  | 7 (1.9)                                        | 8 (2.2)                                        |
| Herpes zoster                           | 1 (0.3)                                        | 2 (0.6)                                        |
| Herpes zoster cutaneous disseminated    | 0                                              | 1 (0.3)                                        |
| Herpes zoster disseminated              | 0                                              | 1 (0.3)                                        |
| Herpes simplex                          | 0                                              | 1 (0.3)                                        |
| Appendicitis                            | 1 (0.3)                                        | 1 (0.3)                                        |
| Pneumothorax                            | 0                                              | 1 (0.3)                                        |
| Large intestine polyp                   | 0                                              | 1 (0.3)                                        |
| Inguinal hernia                         | 1 (0.3)                                        | 0                                              |
| Enteritis infectious                    | 1 (0.3)                                        | 0                                              |
| <i>Pneumocystis jirovecii</i> pneumonia | 1 (0.3)                                        | 0                                              |
| Cerebellar hemorrhage                   | 1 (0.3)                                        | 0                                              |
| Somatic symptom disorder                | 1 (0.3)                                        | 0                                              |

AE adverse event, E/100 PY events per 100 patient-years, PY patient-years

**Supplementary Table 4** Treatment-emergent adverse events leading to study drug discontinuation

| Events (E/100 PY)                       | Week 160                                       |                                                |
|-----------------------------------------|------------------------------------------------|------------------------------------------------|
|                                         | Upadacitinib 15 mg<br>(N = 133;<br>PY = 363.8) | Upadacitinib 30 mg<br>(N = 136;<br>PY = 362.9) |
| Any AE                                  | 9 (2.5)                                        | 7 (1.9)                                        |
| ALT increased                           | 1 (0.3) <sup>a</sup>                           | 1 (0.3) <sup>a</sup>                           |
| Herpes zoster disseminated              | 0                                              | 1 (0.3) <sup>a</sup>                           |
| Acne                                    | 0                                              | 1 (0.3) <sup>a</sup>                           |
| Lymphopenia                             | 0                                              | 1 (0.3) <sup>a</sup>                           |
| Neutropenia                             | 0                                              | 1 (0.3) <sup>a</sup>                           |
| Oedema peripheral                       | 0                                              | 1 (0.3) <sup>a</sup>                           |
| Dermatitis atopic                       | 1 (0.3) <sup>a</sup>                           | 0                                              |
| Lymphocyte morphology abnormal          | 0                                              | 1 (0.3) <sup>a</sup>                           |
| Rectal cancer                           | 1 (0.3)                                        | 0                                              |
| COVID-19                                | 1 (0.3)                                        | 0                                              |
| Eczema herpeticum                       | 1 (0.3)                                        | 0                                              |
| <i>Pneumocystis jirovecii</i> pneumonia | 1 (0.3) <sup>a</sup>                           | 0                                              |
| Cerebellar hemorrhage                   | 1 (0.3) <sup>a</sup>                           | 0                                              |
| Septic shock                            | 1 (0.3)                                        | 0                                              |
| AST increased                           | 1 (0.3) <sup>a</sup>                           | 0                                              |

AE adverse event, ALT alanine aminotransferase, AST aspartate aminotransferase, E/100 PY events per 100 patient-years, PY patient-years

<sup>a</sup>Considered by the investigator as having a reasonable possibility of being related to study drug

**Supplementary Table 5** Long-term safety of upadacitinib among adolescents in the Rising Up study

| Parameter                                            | Week 112; <i>n</i> /PY ( <i>n</i> /100 PY) <sup>a</sup> |                                           | Week 160; <i>n</i> /PY ( <i>n</i> /100 PY) |                                           |
|------------------------------------------------------|---------------------------------------------------------|-------------------------------------------|--------------------------------------------|-------------------------------------------|
|                                                      | Upadacitinib<br>15 mg<br>( <i>N</i> = 14)               | Upadacitinib<br>30 mg<br>( <i>N</i> = 14) | Upadacitinib<br>15 mg<br>( <i>N</i> = 14)  | Upadacitinib<br>30 mg<br>( <i>N</i> = 14) |
| <b>Overview</b>                                      |                                                         |                                           |                                            |                                           |
| Any AE                                               | 13/8.3 (155.8)                                          | 12/4.6 (260.9)                            | 13/8.3 (155.8)                             | 13/4.7 (274.0)                            |
| AE with reasonable possibility of being drug-related | 8/19.9 (40.2)                                           | 6/21.4 (28.1)                             | 8/22.5 (35.6)                              | 7/24.6 (28.4)                             |
| Severe AE                                            | 2/28.3 (7.1)                                            | 1/24.9 (4.0)                              | 2/33.6 (6.0)                               | 1/30.5 (3.3)                              |
| Serious AE                                           | 3/28.0 (10.7) <sup>b</sup>                              | 0/27.2                                    | 3/32.9 (9.1) <sup>b</sup>                  | 1/32.7 (3.1) <sup>c</sup>                 |
| AE leading to discontinuation of upadacitinib        | 1/30.8 (3.2) <sup>d</sup>                               | 1/27.1 (3.7) <sup>e</sup>                 | 1/37.4 (2.7) <sup>d</sup>                  | 1/33.4 (3.0) <sup>e</sup>                 |
| Deaths                                               | 0/31.1                                                  | 0/27.2                                    | 0/37.7                                     | 0/33.5                                    |
| <b>Most common AEs<sup>d</sup></b>                   |                                                         |                                           |                                            |                                           |
| Acne                                                 | 6/20.6 (29.2)                                           | 7/13.7 (51.2)                             | 6/23.7 (25.3)                              | 7/16.2 (43.1)                             |
| Nasopharyngitis                                      | 4/24.5 (16.4)                                           | 7/18.3 (38.2)                             | 4/29.0 (13.8)                              | 7/22.3 (31.4)                             |
| Influenza                                            | 2/27.0 (7.4)                                            | 2/23.2 (8.6)                              | 2/32.5 (6.1)                               | 2/29.1 (6.9)                              |
| Upper RTI                                            | 3/24.1 (12.4)                                           | 1/24.7 (4.0)                              | 3/29.0 (10.3)                              | 1/30.5 (3.3)                              |
| Anemia                                               | 3/28.0 (10.7)                                           | 0/27.2                                    | 3/33.0 (9.1)                               | 0/33.5                                    |
| Asthma                                               | 1/29.2 (3.4)                                            | 2/23.5 (8.5)                              | 1/35.1 (2.8)                               | 2/28.6 (7.0)                              |
| Blood CPK increased                                  | 2/27.2 (7.4)                                            | 1/26.8 (3.7)                              | 2/32.9 (6.1)                               | 1/33.0 (3.0)                              |
| Headache                                             | 1/30.2 (3.3)                                            | 2/25.6 (7.8)                              | 1/36.1 (2.8)                               | 4/30.2 (13.2)                             |
| Otitis externa                                       | 2/28.5 (7.0)                                            | 1/26.2 (3.8)                              | 2/34.0 (5.9)                               | 1/32.0 (3.1)                              |
| Pharyngitis                                          | 1/29.7 (3.4)                                            | 2/23.8 (8.4)                              | 1/35.9 (2.8)                               | 2/28.9 (6.9)                              |

**Supplementary Table 5** Long-term safety of upadacitinib among adolescents in the Rising Up study

| Parameter                          | Week 112; <i>n</i> /PY ( <i>n</i> /100 PY) <sup>a</sup> |                                     | Week 160; <i>n</i> /PY ( <i>n</i> /100 PY) |                                     |
|------------------------------------|---------------------------------------------------------|-------------------------------------|--------------------------------------------|-------------------------------------|
|                                    | Upadacitinib 15 mg ( <i>N</i> = 14)                     | Upadacitinib 30 mg ( <i>N</i> = 14) | Upadacitinib 15 mg ( <i>N</i> = 14)        | Upadacitinib 30 mg ( <i>N</i> = 14) |
| Pyrexia                            | 2/27.5 (7.3)                                            | 1/24.9 (4.0)                        | 2/33.1 (6.0)                               | 3/29.6 (10.1)                       |
| Skin papilloma                     | 1/30.8 (3.2)                                            | 2/25.9 (7.7)                        | 2/36.6 (5.5)                               | 2/30.9 (6.5)                        |
| Enterocolitis                      | 0/31.1                                                  | 2/25.3 (7.9)                        | 0/37.7                                     | 2/31.0 (6.5)                        |
| Gastroenteritis                    | 2/30.2 (6.6)                                            | 0/27.2                              | 2/35.8 (5.6)                               | 0/33.5                              |
| Hepatic function abnormal          | 2/30.2 (6.6)                                            | 0/27.2                              | 2/36.2 (5.5)                               | 0/33.5                              |
| Herpes zoster                      | 0/31.1                                                  | 2/26.3 (7.6)                        | 0/37.7                                     | 3/31.3 (9.6)                        |
| Impetigo                           | 2/30.0 (6.7)                                            | 0/27.2                              | 2/35.9 (5.6)                               | 0/33.5                              |
| Dermatitis atopic                  | 1/30.8 (3.2)                                            | 1/25.5 (3.9)                        | 1/37.4 (2.7)                               | 3/31.3 (9.6)                        |
| Malaise                            | 1/28.8 (3.5)                                            | 0/27.2                              | 2/34.2 (5.8)                               | 2/32.5 (6.2)                        |
| Alanine aminotransferase increased | 1/30.4 (3.3)                                            | 0/27.2                              | 2/35.7 (5.6)                               | 0/33.5                              |
| Vaccination site pain              | 0/31.1                                                  | 0/27.2                              | 0/37.7                                     | 2/32.6 (6.1)                        |

AE adverse event, CPK creatine phosphokinase, *n*/100 PY number of patients with at least one event per 100 patient-years, *n*/PY number of patients with at least one event/patient-years for patients at risk of an event, RTI respiratory tract infection

<sup>a</sup>Data through week 112 were previously reported [17]

<sup>b</sup>Serious AEs included appendicitis (considered possibly related to study drug), concussion due to accident (unrelated to study drug), and irritable bowel syndrome (unrelated to study drug)

<sup>c</sup>Meniscus injury (unrelated to study drug)

<sup>d</sup>Worsening of atopic dermatitis (considered possibly related to study drug).

<sup>e</sup>Atypical lymphocytes seen in peripheral blood smear that resolved; event was not considered a malignancy

<sup>f</sup>Most common AEs are defined as those occurring in  $\geq 2$  patients in either adolescent treatment group at week 160



**Supplementary Table 6** Exposure-adjusted event rates for AEsIs through 112 weeks and 160 weeks in the Rising Up study

| AEsI                                                         | Week 112, events (E/100 PY) <sup>a</sup>          |                                                   | Week 160, events (E/100 PY)                       |                                                   |
|--------------------------------------------------------------|---------------------------------------------------|---------------------------------------------------|---------------------------------------------------|---------------------------------------------------|
|                                                              | Upadacitinib<br>15 mg<br>(N = 133;<br>PY = 289.4) | Upadacitinib<br>30 mg<br>(N = 136;<br>PY = 287.7) | Upadacitinib<br>15 mg<br>(N = 133;<br>PY = 363.8) | Upadacitinib<br>30 mg<br>(N = 136;<br>PY = 362.9) |
| Serious infections                                           | 6 (2.1)                                           | 4 (1.4)                                           | 7 (1.9)                                           | 9 (2.5)                                           |
| Opportunistic infection<br>excluding TB and<br>herpes zoster | 16 (5.5)                                          | 7 (2.4)                                           | 19 (5.2)                                          | 10 (2.8)                                          |
| Malignancy                                                   | 1 (0.3)                                           | 0                                                 | 1 (0.3)                                           | 0                                                 |
| NMSC                                                         | 0                                                 | 0                                                 | 0                                                 | 0                                                 |
| Malignancy<br>excluding NMSC                                 | 1 (0.3)                                           | 0                                                 | 1 (0.3)                                           | 0                                                 |
| Lymphoma                                                     | 0                                                 | 1 (0.3)                                           | 0                                                 | 1 (0.3)                                           |
| Hepatic disorder                                             | 18 (6.2)                                          | 19 (6.6)                                          | 25 (6.9)                                          | 26 (7.2)                                          |
| Gastrointestinal<br>perforation                              | 0                                                 | 0                                                 | 0                                                 | 0                                                 |
| Anemia                                                       | 5 (1.7)                                           | 9 (3.1)                                           | 5 (1.4)                                           | 11 (3.0)                                          |
| Neutropenia                                                  | 2 (0.7)                                           | 12 (4.2)                                          | 3 (0.8)                                           | 14 (3.9)                                          |
| Lymphopenia                                                  | 0                                                 | 2 (0.7)                                           | 0                                                 | 5 (1.4)                                           |
| Herpes zoster                                                | 21 (7.3)                                          | 37 (12.9)                                         | 31 (8.5)                                          | 48 (13.2)                                         |
| CPK elevation                                                | 6 (2.1)                                           | 13 (4.5)                                          | 8 (2.2)                                           | 16 (4.4)                                          |
| Renal dysfunction                                            | 0                                                 | 0                                                 | 0                                                 | 0                                                 |
| Active TB                                                    | 0                                                 | 0                                                 | 0                                                 | 0                                                 |
| Adjudicated MACE <sup>b</sup>                                | 1 (0.3)                                           | 0                                                 | 1 (0.3)                                           | 0                                                 |
| Adjudicated VTE <sup>c</sup>                                 | 0                                                 | 0                                                 | 0                                                 | 0                                                 |

AEsI adverse event of special interest, MACE major adverse cardiovascular event, E/100 PY events per 100 patient-years, NMSC nonmelanoma skin cancer, PY patient-years, TB tuberculosis, VTE venous thromboembolic events

<sup>a</sup>Data through week 112 were previously reported [17]

<sup>b</sup>MACE is defined as cardiovascular death, nonfatal myocardial infarction, and nonfatal stroke

<sup>c</sup>VTE is defined as deep vein thrombosis and pulmonary embolism (fatal and nonfatal)

**Supplementary Table 7** Long-term exposure-adjusted incidence rates for AEsIs among adolescents in the Rising Up study

| AEsI                                                         | Week 112; <i>n</i> /PY ( <i>n</i> /100 PY) <sup>a</sup> |                                           | Week 160; <i>n</i> /PY ( <i>n</i> /100 PY) |                                           |
|--------------------------------------------------------------|---------------------------------------------------------|-------------------------------------------|--------------------------------------------|-------------------------------------------|
|                                                              | Upadacitinib<br>15 mg<br>( <i>N</i> = 14)               | Upadacitinib<br>30 mg<br>( <i>N</i> = 14) | Upadacitinib<br>15 mg<br>( <i>N</i> = 14)  | Upadacitinib<br>30 mg<br>( <i>N</i> = 14) |
| Serious infection                                            | 1/29.6 (3.4) <sup>b</sup>                               | 0/27.2                                    | 1/35.5 (2.8) <sup>b</sup>                  | 0/33.5                                    |
| Opportunistic infection<br>excluding TB and<br>herpes zoster | 1/30.8 (3.2) <sup>c</sup>                               | 0/27.2                                    | 1/37.4 (2.7) <sup>c</sup>                  | 0/33.5                                    |
| Malignancy                                                   | 0/31.1                                                  | 0/27.2                                    | 0/37.7                                     | 0/33.5                                    |
| NMSC                                                         | 0/31.1                                                  | 0/27.2                                    | 0/37.7                                     | 0/33.5                                    |
| Malignancy<br>excluding NMSC                                 | 0/31.1                                                  | 0/27.2                                    | 0/37.7                                     | 0/33.5                                    |
| Lymphoma                                                     | 0/31.1                                                  | 1/27.1 (3.7) <sup>d</sup>                 | 0/37.7                                     | 1/33.4 (3.0) <sup>d</sup>                 |
| Hepatic disorder                                             | 3/29.5 (10.2)                                           | 1/26.1 (3.8)                              | 4/34.1 (11.7)                              | 1/31.9 (3.1)                              |
| Gastrointestinal<br>perforation                              | 0/31.1                                                  | 0/27.2                                    | 0/37.7                                     | 0/33.5                                    |
| Anemia                                                       | 3/28.0 (10.7)                                           | 0/27.2                                    | 3/33.0 (9.1)                               | 0/33.5                                    |
| Neutropenia                                                  | 0/31.1                                                  | 1/26.1 (3.8)                              | 0/37.7                                     | 1/31.9 (3.1)                              |
| Lymphopenia                                                  | 0/31.1                                                  | 0/27.2                                    | 0/37.7                                     | 0/33.5                                    |
| Herpes zoster                                                | 0/31.1                                                  | 2/26.3 (7.6)                              | 0/37.7                                     | 3/31.3 (9.6)                              |
| CPK elevation                                                | 2/27.2 (7.4)                                            | 1/26.8 (3.7)                              | 2/32.9 (6.1)                               | 1/33.0 (3.0)                              |
| Renal dysfunction                                            | 0/31.1                                                  | 0/27.2                                    | 0/37.7                                     | 0/33.5                                    |
| Active tuberculosis                                          | 0/31.1                                                  | 0/27.2                                    | 0/37.7                                     | 0/33.5                                    |
| Adjudicated MACE                                             | 0/31.1                                                  | 0/27.2                                    | 0/37.7                                     | 0/33.5                                    |
| Adjudicated VTE                                              | 0/31.1                                                  | 0/27.2                                    | 0/37.7                                     | 0/33.5                                    |

AEsI adverse event of special interest, MACE major adverse cardiovascular event, *n*/100 PY number of patients with at least one event per 100 patient-years, NMSC nonmelanoma skin cancer, *n*/PY number of patients with at least one event/patient-years for patients at risk of an event, TB tuberculosis, VTE venous thromboembolic events

<sup>a</sup>Data through week 112 were previously reported [17]

<sup>b</sup>Appendicitis (considered possibly related to study drug)

<sup>c</sup>Eczema herpeticum (considered possibly related to study drug)

<sup>d</sup>Atypical lymphocytes seen in peripheral blood smear that resolved; event was not considered a malignancy

**Supplementary Table 8** Institutional review boards and ethics committees for the Rising Up study

| <b>IRB/IEC Name</b>                                                           | <b>City</b>    | <b>Prefecture</b> | <b>Country</b> |
|-------------------------------------------------------------------------------|----------------|-------------------|----------------|
| Asahikawa Medical University Hospital Institutional Review Board              | Asahikawa-shi  | Hokkaido          | Japan          |
| Central Japan International Medical Center Institutional Review Board         | Minokamo-shi   | Gifu              | Japan          |
| Fukuyama City Hospital Institutional Review Board                             | Fukuyama-shi   | Hiroshima         | Japan          |
| Gunma University Hospital Institutional Review Board                          | Maebashi-shi   | Gunma             | Japan          |
| Hokkaido P.W.F.A.C Sapporo-Kosei General Hospital Institutional Review Board  | Sapporo-shi    | Hokkaido          | Japan          |
| Hyogo Prefectural Amagasaki General Medical Center Institutional Review Board | Amagasaki-shi  | Hyogo             | Japan          |
| Ichinomiya Municipal Hospital Institutional Review Board                      | Ichinomiya-shi | Aichi             | Japan          |
| Japan Conference of Clinical Research                                         | Toshima-ku     | Tokyo             | Japan          |
| Joint Institutional Review Board                                              | Kochi-shi      | Kochi             | Japan          |
| Kansai Rosai Hospital Institutional Review Board                              | Amagasaki-shi  | Hyogo             | Japan          |
| Kiryu Kosei General Hospital Institutional Review Board                       | Kiryu-shi      | Gunma             | Japan          |
| Kobe University Hospital Institutional Review Board                           | Kobe-shi       | Hyogo             | Japan          |
| Nagaoka Red Cross Hospital Institutional Review Board                         | Nagaoka-shi    | Niigata           | Japan          |
| Nagasaki University Hospital Institutional Review Board                       | Nagasaki-shi   | Nagasaki          | Japan          |
| Nagoya City University Institutional Review Board                             | Nagoya-shi     | Aichi             | Japan          |

**Supplementary Table 8** Institutional review boards and ethics committees for the Rising Up study

| <b>IRB/IEC Name</b>                                                                 | <b>City</b>  | <b>Prefecture</b> | <b>Country</b> |
|-------------------------------------------------------------------------------------|--------------|-------------------|----------------|
| Nakameguro Atlas Clinic Institutional Review Board                                  | Meguro-ku    | Tokyo             | Japan          |
| Nihon University Hospitals' Joint Institutional Review Board                        | Itabashi-Ku  | Tokyo             | Japan          |
| Nihonbashi Sakura Clinic Institutional Review Board                                 | Chuo-ku      | Tokyo             | Japan          |
| Nippon Medical School Musashi Kosugi Hospital Institutional Review Board            | Kawasaki-shi | Kanagawa          | Japan          |
| Shizuoka General Hospital Institutional Review Board                                | Shizuoka shi | Shizuoka          | Japan          |
| Tokai University Hospital-Isehara Campus                                            | Isehara-Shi  | Kanagawa          | Japan          |
| Tokyo Allergy and Respiratory Disease Research Institute Institutional Review Board | Taito-ku     | Tokyo             | Japan          |
| Tokyo Eki Center Building Clinic Institutional Review Board                         | Chuo-ku      | Tokyo             | Japan          |
| Tokyo Rosai Hospital Institutional Review Board                                     | Ohta-ku      | Tokyo             | Japan          |
| Toyama Prefectural Central Hospital Institutional Review Board                      | Toyama-shi   | Toyama            | Japan          |
| Yokohama Rosai Hospital Institutional Review Board                                  | Yokhama-shi  | Kanagawa          | Japan          |

Adapted from Katoh N, et al. Safety and Efficacy of Upadacitinib for Atopic Dermatitis in Japan: 2-Year Interim Results from the Phase 3 Rising Up Study. *Dermatol Ther (Heidelb)*. 2023;13:221–234. Creative Commons license and disclaimer available from: <http://creativecommons.org/licenses/by/4.0/>





**Supplementary Fig. 2** Patients achieving EASI 90 from baseline to week 160 among all study cohorts, including patients who switched from placebo to upadacitinib

*EASI 90*  $\geq$  90% improvement in Eczema Area and Severity Index, *NRI* nonresponder imputation, *OC* observed cases, *PBO* placebo, *UPA* upadacitinib

The OC analysis does not impute values for missing evaluations; patients without an evaluation at a scheduled visit will be excluded from the OC analysis for that visit. The NRI analysis categorizes any patient without an evaluation during a specific visit window as a nonresponder for that visit; the exception is if the patient is a responder both before and after a specific visit window, then the patient will be categorized as a responder for that visit

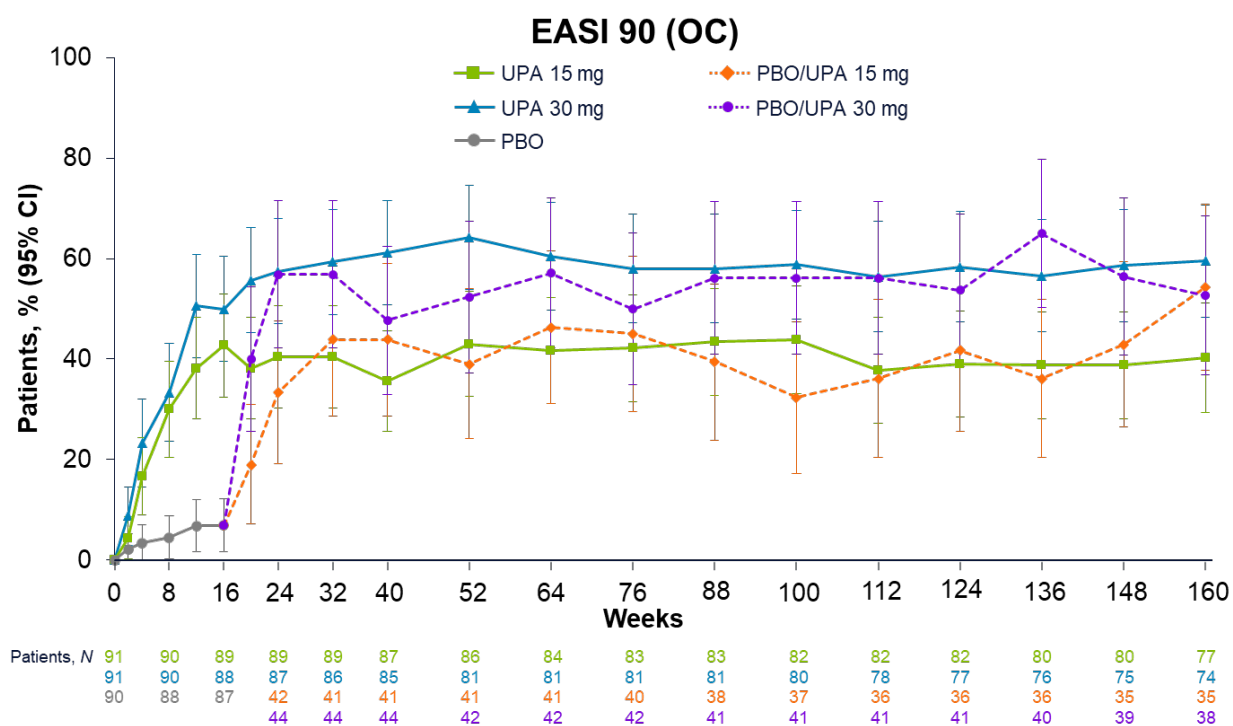





**Supplementary Fig. 3** Patients achieving vIGA-AD 0/1<sup>a</sup> from baseline to week 160 among all study cohorts, including patients who switched from placebo to upadacitinib

*NRI* nonresponder imputation, *OC* observed cases, *PBO* placebo, *UPA* upadacitinib, *vIGA-AD 0/1* validated Investigator Global Assessment for Atopic Dermatitis score of clear or almost clear

<sup>a</sup>Patients achieving vIGA-AD 0/1 with at least two grades of reduction from baseline

The OC analysis does not impute values for missing evaluations; patients without an evaluation at a scheduled visit will be excluded from the OC analysis for that visit. The NRI analysis categorizes any patient without an evaluation during a specific visit window as a nonresponder for that visit; the exception is if the patient is a responder both before and after a specific visit window, then the patient will be categorized as a responder for that visit

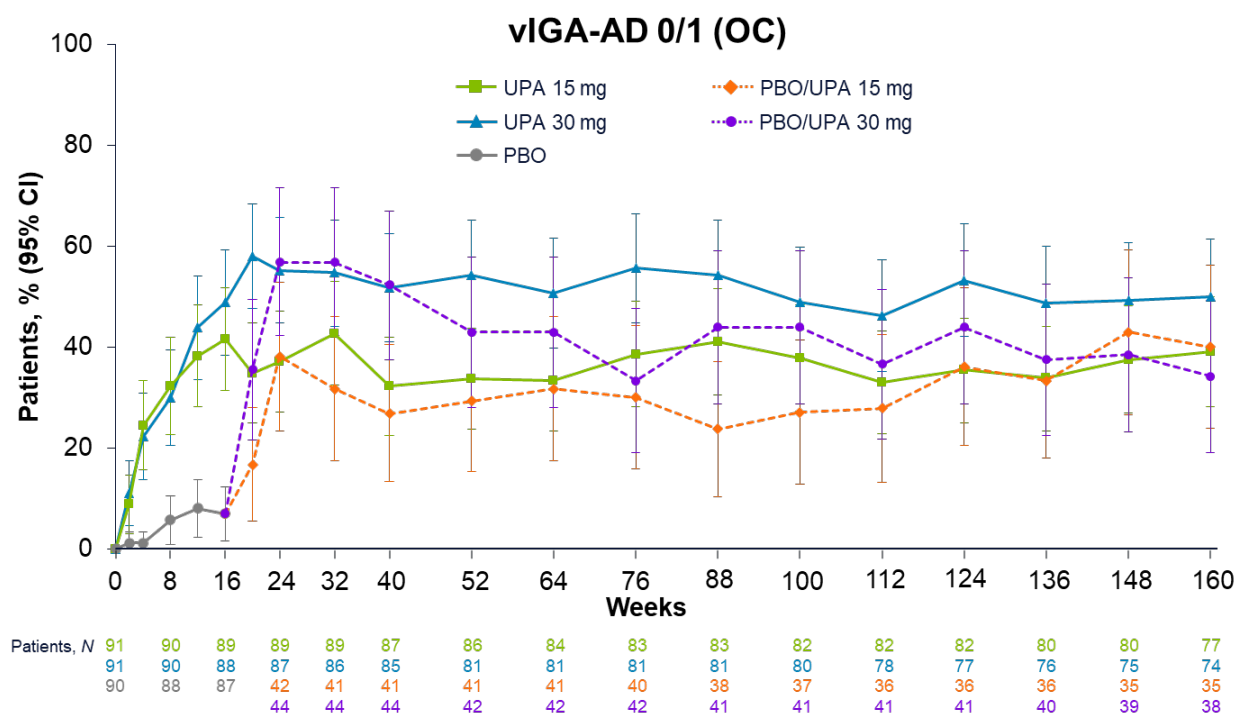



**Supplementary Fig. 4** Patients achieving WP-NRS  $\geq 4$ -point improvement<sup>a</sup> from baseline to week 160 among all study cohorts, including patients who switched from placebo to upadacitinib

*NRI* nonresponder imputation, *OC* observed cases, *PBO* placebo, *UPA* upadacitinib, *WP-NRS* Worst Pruritus Numerical Rating Scale

<sup>a</sup>Among patients with WP-NRS scores  $\geq 4$  at baseline

The OC analysis does not impute values for missing evaluations; patients without an evaluation at a scheduled visit will be excluded from the OC analysis for that visit. The NRI analysis categorizes any patient without an evaluation during a specific visit window as a nonresponder for that visit; the exception is if the patient is a responder both before and after a specific visit window, then the patient will be categorized as a responder for that visit

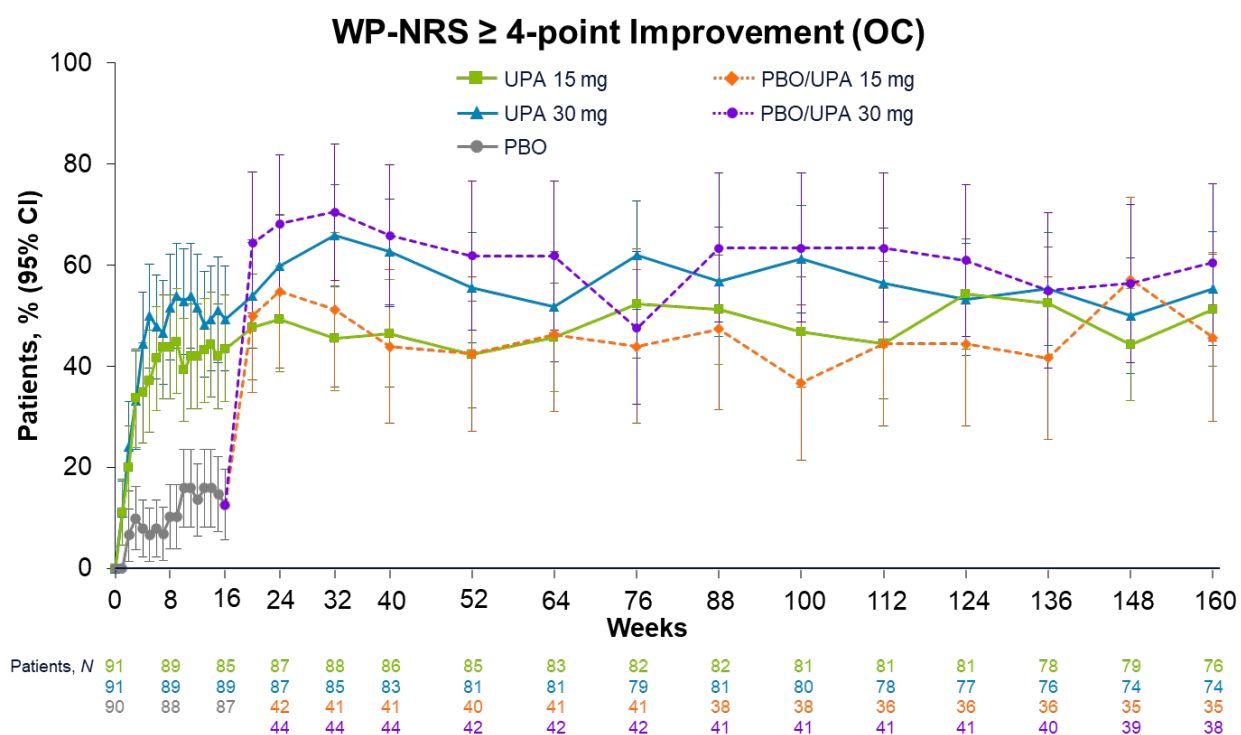







**Supplementary Fig. 6** Adults and adolescents achieving EASI 90 from baseline to week 160 among all study cohorts, including adults and adolescents who switched from placebo to upadacitinib

EASI 90 ≥ 90% improvement in Eczema Area and Severity Index, OC observed cases, PBO placebo, UPA upadacitinib

The OC analysis does not impute values for missing evaluations; patients without an evaluation at a scheduled visit will be excluded from the OC analysis for that visit

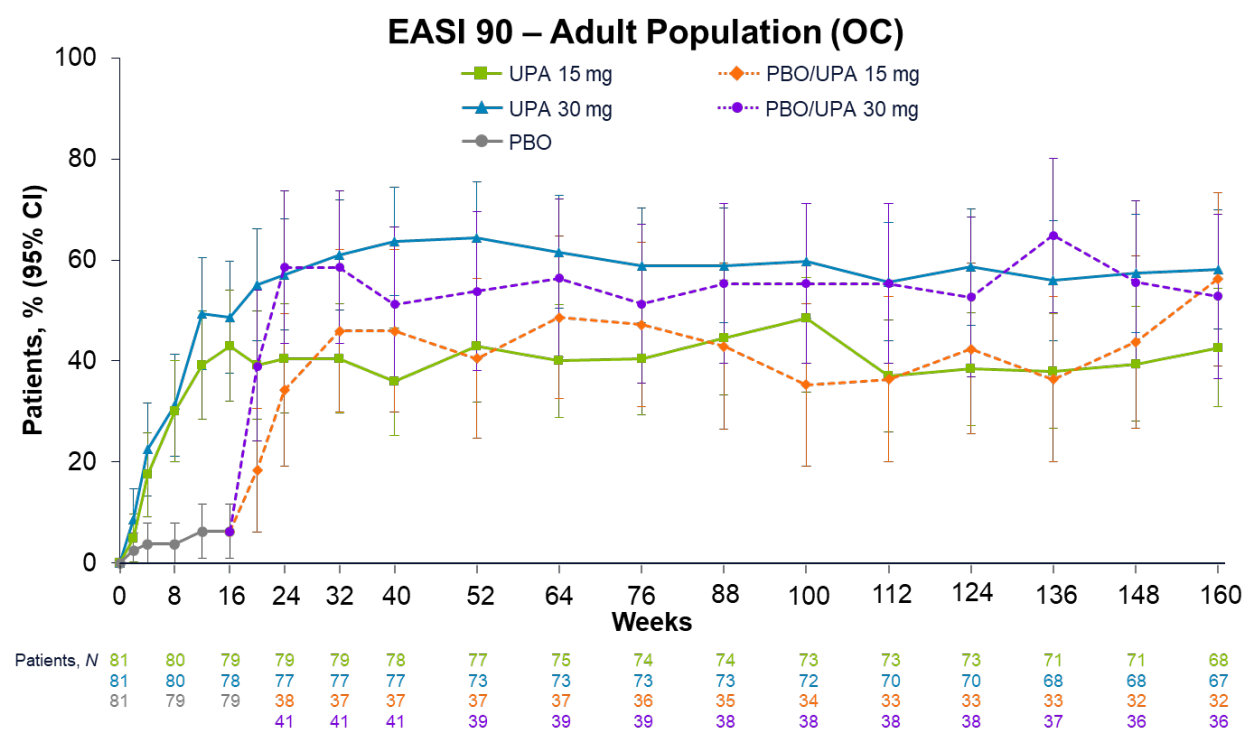





**Supplementary Fig. 7** Adults and adolescents achieving vIGA-AD 0/1<sup>a</sup> from baseline to week 160 among all study cohorts, including adults and adolescents who switched from placebo to upadacitinib

OC observed cases, PBO placebo, UPA upadacitinib, vIGA-AD 0/1 validated Investigator Global Assessment for Atopic Dermatitis score of clear or almost clear

<sup>a</sup>Patients achieving vIGA-AD 0/1 with at least two grades of reduction from baseline

The OC analysis does not impute values for missing evaluations; patients without an evaluation at a scheduled visit will be excluded from the OC analysis for that visit

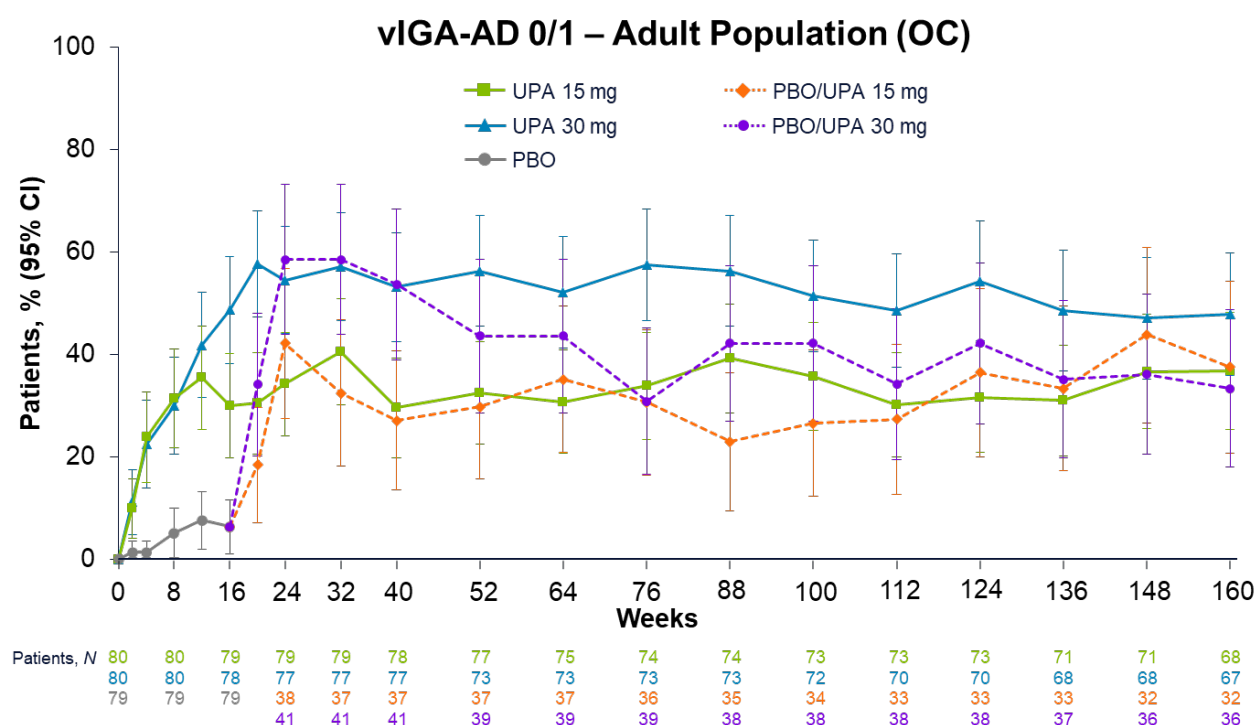

### vIGA-AD 0/1 – Adolescent Population (OC)

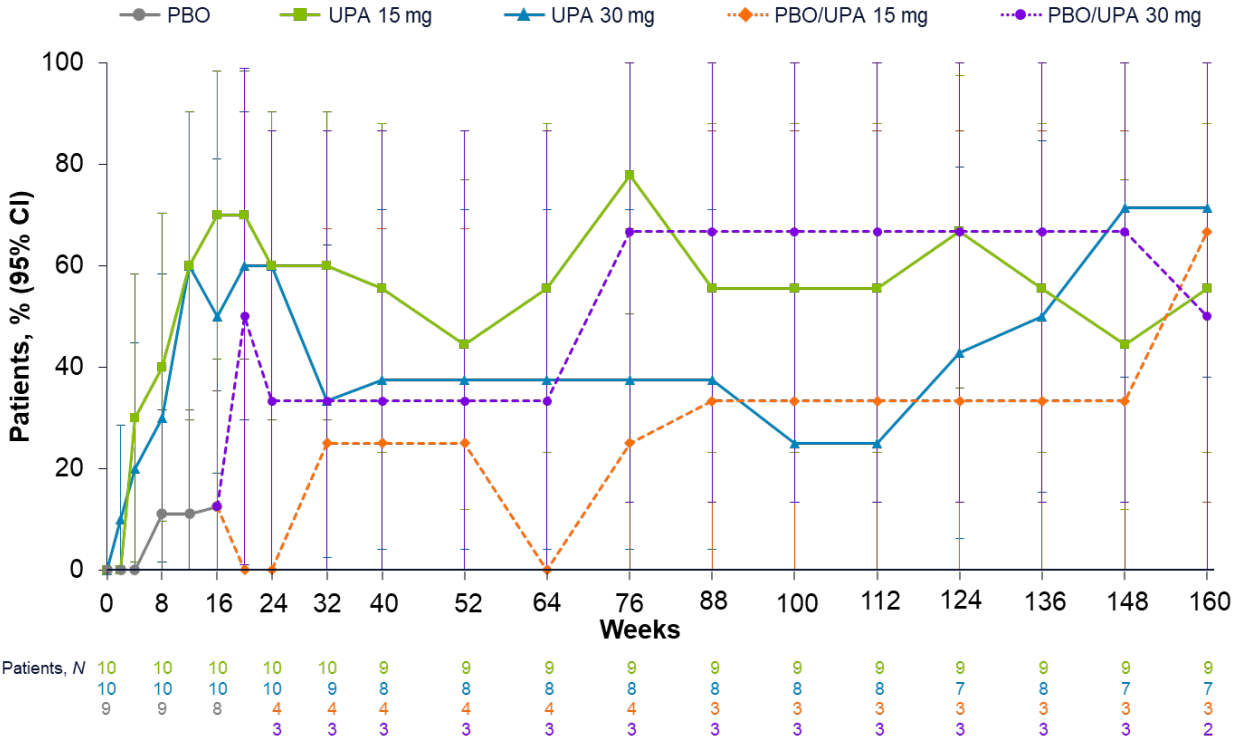

**Supplementary Fig. 8** Adults and adolescents achieving WP-NRS  $\geq 4$ -point improvement<sup>a</sup> from baseline to week 160 among all study cohorts, including adults and adolescents who switched from placebo to upadacitinib

OC observed cases, PBO placebo, UPA upadacitinib, WP-NRS Worst Pruritus Numerical Rating Scale

<sup>a</sup>Among patients with WP-NRS scores  $\geq 4$  at baseline

The OC analysis does not impute values for missing evaluations; patients without an evaluation at a scheduled visit will be excluded from the OC analysis for that visit

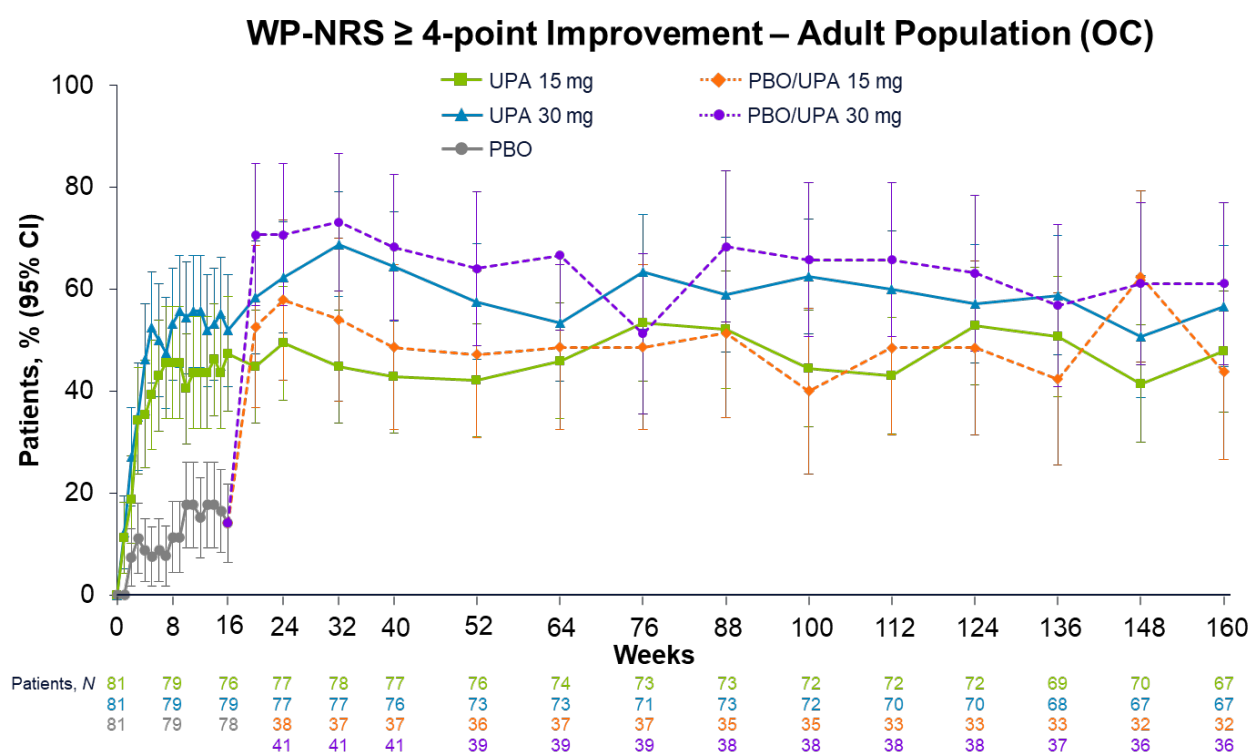

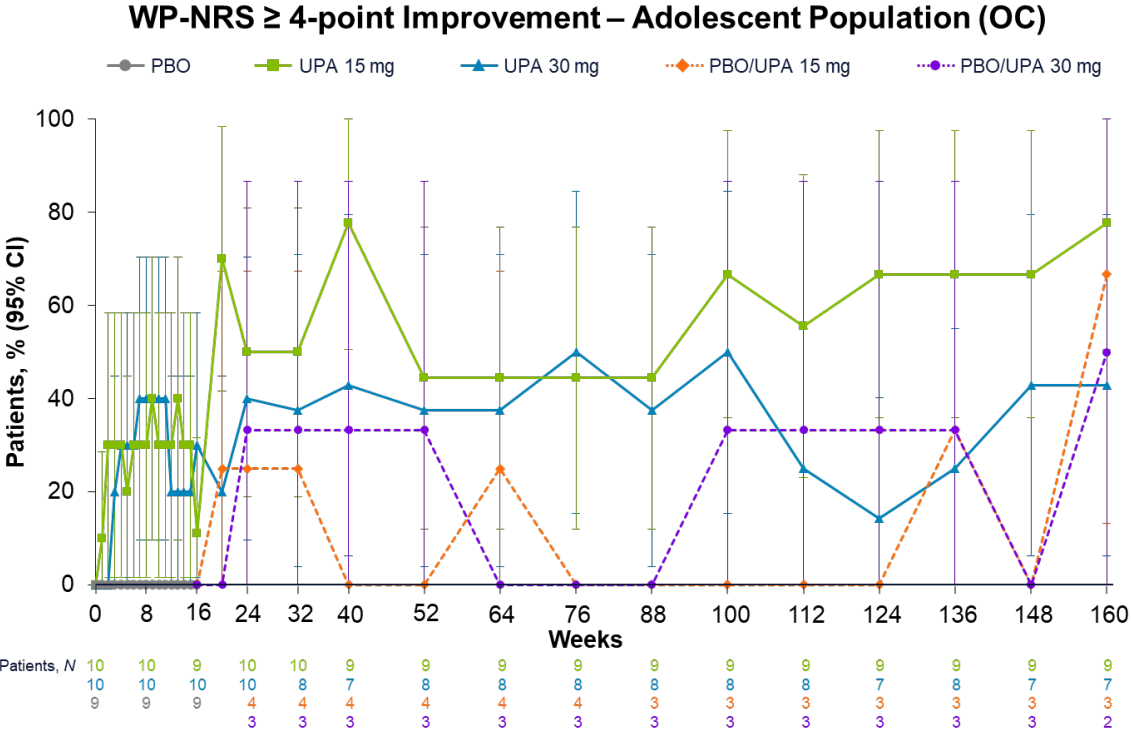

**Supplementary Fig. 9** Mean proportion of days in which patients were not receiving concomitant TCS therapy from baseline to week 160 among all study cohorts, including patients who switched from placebo to upadacitinib (OC)

*EASI 75*  $\geq$  75% improvement in Eczema Area and Severity Index, *OC* observed cases, *PBO* placebo, *TCS* topical corticosteroids, *UPA* upadacitinib

**A** Visit window average of proportion of days in which patients were not receiving concomitant TCS therapy from baseline to week 160

**B** Visit window average of proportion of days in which patients achieved *EASI 75* and were not receiving concomitant TCS therapy from baseline to week 160

The OC analysis does not impute values for missing evaluations; patients without an evaluation at a scheduled visit will be excluded from the OC analysis for that visit

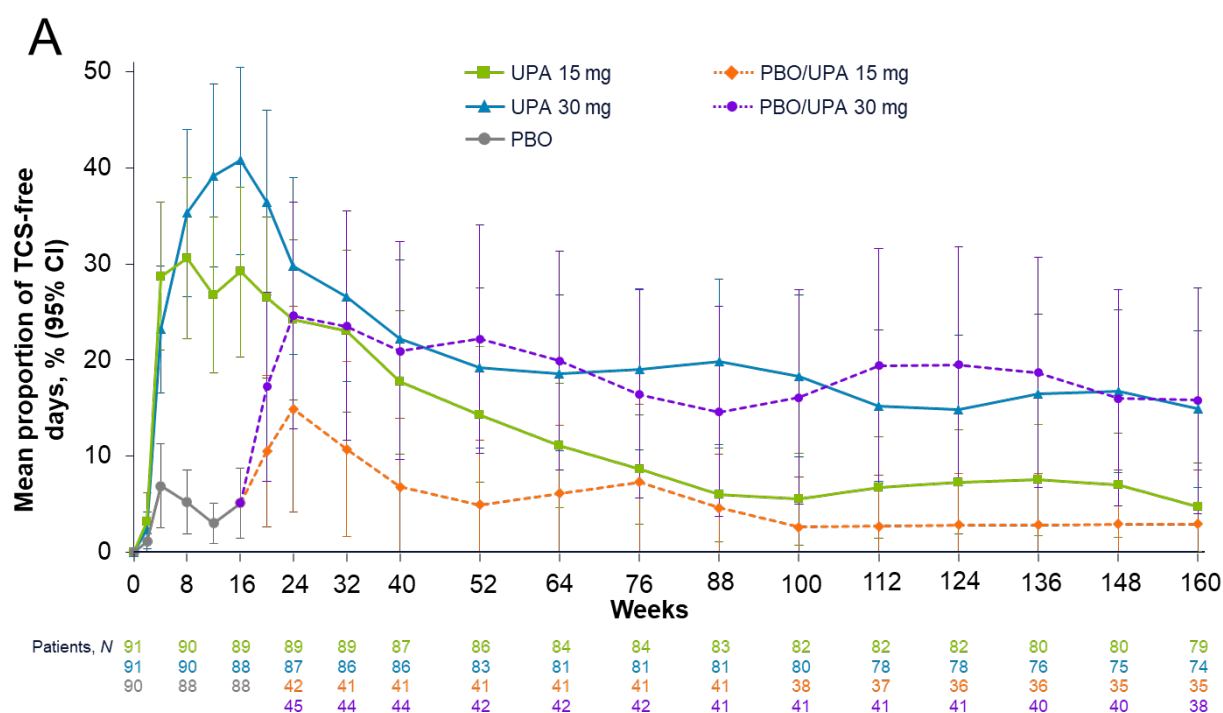

**B**

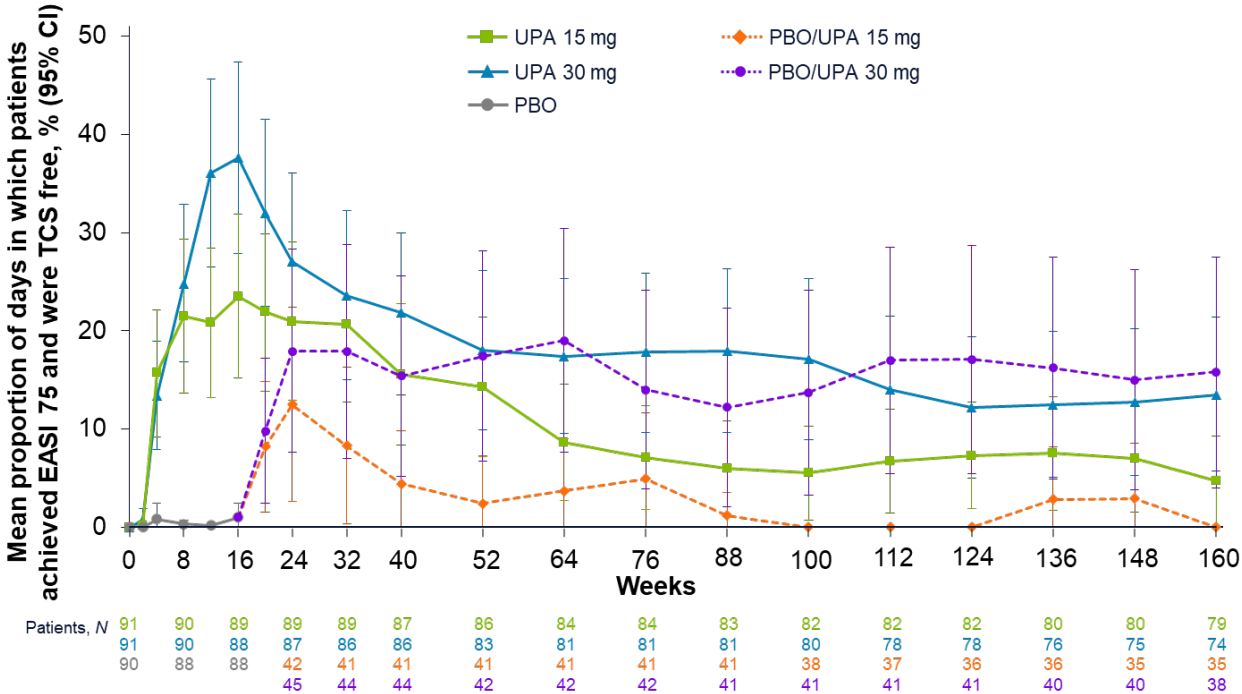

Supplement: MOESM1 [file 26555696]
